# Supplementary material for: CRYPTIC PRECOCIOUS/MED12 is a Novel Flowering Regulator with Multiple Target Steps in Arabidopsis
Source: PubMed Central journal article supplement — Plant Cell Physiol. 2012 Jan 13;53(2):287–303. doi: 10.1093/pcp/pcs002 (PMC3278046; doi:10.1093/pcp/pcs002), 2012-01-13
Supplement: supp_pcs002_pcp-2011-e-00482-File020.pdf [file supp_pcs002_pcp-2011-e-00482-File020.pdf]

## Supplementary Online Data

**Title: CRYPTIC PRECOCIOUS/MED12 is a novel flowering regulator with multiple target steps in *Arabidopsis***

Yuri Imura, Yasushi Kobayashi, Sumiko Yamamoto, Masahiko Furutani, Masao Tasaka, Mitsutomo Abe, and Takashi Araki

**Supplementary Table S1.** Effect of *crp-1D* mutation on flowering time of transgenic plants over-expressing *FT*, *TSF*, *SOC1*, *LFY* and *API*.

| Genotype                                        | Number of rosette | Number of cauline | n  |
|-------------------------------------------------|-------------------|-------------------|----|
|                                                 | leaves            | leaves            |    |
| Col                                             | 10.4 ± 1.1        | 2.8 ± 0.6         | 12 |
| Col × <i>crp-1D</i> F1                          | 8.7 ± 0.9         | 3.1 ± 0.5         | 11 |
| <i>crp-1D</i>                                   | 8.1 ± 0.8         | 2.8 ± 0.7         | 13 |
| 35S:: <i>FT</i> #11-1                           | 3.7 ± 0.5         | 1.4 ± 0.5         | 15 |
| <i>crp-1D</i> × 35S:: <i>FT</i> #11-1 F1        | 0.7 ± 0.8 *       | 1.9 ± 0.5         | 18 |
| 35S:: <i>FT</i> #1-5C                           | 4.3 ± 0.5         | 1.1 ± 0.6         | 15 |
| <i>crp-1D</i> × 35S:: <i>FT</i> #1-5C F1        | 2.1 ± 0.3 *       | 1.5 ± 0.5         | 13 |
| <i>SULTR2;1</i> :: <i>FT</i>                    | 4.7 ± 0.5         | 1.3 ± 0.5         | 15 |
| <i>crp-1D</i> × <i>SULTR2;1</i> :: <i>FT</i> F1 | 2.6 ± 0.5 *       | 1.4 ± 0.5         | 10 |
| 35S:: <i>TSF</i> #4-1                           | 7.7 ± 0.5         | 2.3 ± 0.5         | 13 |
| <i>crp-1D</i> × 35S:: <i>TSF</i> #4-1 F1        | 3.9 ± 0.4 *       | 1.5 ± 0.5         | 14 |
| Col                                             | 10.3 ± 1.0        | 2.3 ± 0.5         | 12 |
| <i>crp-1D</i>                                   | 6.4 ± 0.8         | 3.0 ± 0.4         | 14 |
| Col × <i>soc1-101D</i> F1                       | 5.4 ± 0.6         | 2.6 ± 0.5         | 16 |
| <i>crp-1D</i> × <i>soc1-101D</i> F1             | 4.9 ± 0.5         | 2.9 ± 0.7         | 27 |
| Col                                             | 10.4 ± 0.7        | 2.4 ± 0.5         | 12 |
| <i>crp-1D</i>                                   | 7.6 ± 0.8         | 3.1 ± 0.4         | 14 |
| 35S:: <i>LFY</i>                                | 7.7 ± 1.3         | 4.0 ± 1.8         | 8  |
| <i>crp-1D</i> × 35S:: <i>LFY</i> F1             | 6.0 ± 0.7 *       | 2.8 ± 0.8         | 14 |
| 35S:: <i>API</i>                                | 5.8 ± 0.5         | 2.1 ± 0.6         | 13 |
| <i>crp-1D</i> × 35S:: <i>API</i> F1             | 5.4 ± 0.6         | 2.6 ± 0.5         | 19 |
| Ler                                             | 7.6 ± 0.7         | 3.3 ± 0.5         | 14 |
| <i>crp-1D</i> Ler                               | 5.8 ± 0.8         | 3.3 ± 0.5         | 16 |
| 35S:: <i>FT</i> #1-5L                           | 2.9 ± 0.6         | 2.7 ± 0.5         | 19 |
| <i>crp-1D</i> × 35S:: <i>FT</i> #1-5L F1        | 1.3 ± 0.9 *       | 3.4 ± 1.1         | 11 |

**(Supplementary Table S1 continued)**

Statistics for results presented in Fig. 1E, 4A and 4E.

The number of leaves is presented as the average  $\pm$  SD.

Plants were grown on 1/2MS medium under long-day conditions.

\* Statistically significant difference (Student's *t*-test,  $P < 0.005$ ) from the respective parental transgenic line.

**Supplementary Table S2.** Flowering time of *crp* and *mab2* single mutants under long-day and short-day conditions.

| Genotype      | Number of rosette leaves | Number of cauline leaves | n  |
|---------------|--------------------------|--------------------------|----|
| Long day      |                          |                          |    |
| Col           | 12.5 ± 0.9               | 2.9 ± 0.5                | 15 |
| <i>crp-1D</i> | 8.8 ± 0.9 *              | 2.6 ± 0.5                | 12 |
| <i>crp-3</i>  | 29.1 ± 1.7 *             | 8.5 ± 0.8                | 11 |
| <i>crp-4</i>  | 28.1 ± 2.5 *             | 8.6 ± 1.7                | 12 |
| Ler           | 6.3 ± 0.5                | 2.4 ± 0.5                | 15 |
| <i>crp-2</i>  | 10.9 ± 0.7 *             | 5.9 ± 0.7                | 14 |
| <i>mab2-1</i> | 10.0 ± 0.8 *             | 3.4 ± 0.7                | 10 |
| Short day     |                          |                          |    |
| Col           | 52.9 ± 4.2               | 8.6 ± 0.5                | 14 |
| <i>crp-1D</i> | 42.8 ± 1.8 *             | 7.8 ± 0.8                | 14 |
| <i>crp-3</i>  | 53.9 ± 6.0               | 16 ± 3.0                 | 7  |
| <i>crp-4</i>  | 46.6 ± 4.5 *             | 16.9 ± 1.2               | 10 |
| Ler           | 16.6 ± 0.7               | 5.8 ± 1.0                | 14 |
| <i>crp-2</i>  | 18.3 ± 1.5               | 14.7 ± 0.6               | 3  |
| <i>mab2-1</i> | 18.8 ± 2.0               | 10.4 ± 2.4               | 9  |

Statistics for results presented in Fig. 1E, 2A, 2B, 5A and 5B.

The number of leaves is presented as the average ± SD.

Plants were grown on soil.

\* Statistically significant difference (Student's *t*-test,  $P < 0.005$ ) between marked genotypes and the respective wild types.

**Supplementary Table S3.** Effect of *crp-3* and *crp-4* mutation on flowering time of *SULTR2;1::FT*.

| Genotype                   | Number of rosette<br>leaves | Number of cauline<br>leaves | n  |
|----------------------------|-----------------------------|-----------------------------|----|
| Col                        | 9.3 ± 0.5                   | 2.7 ± 0.5                   | 12 |
| <i>crp-3</i>               | 31.5 ± 3.6                  | 8.9 ± 1.4                   | 10 |
| <i>crp-4</i>               | 30.9 ± 2.4                  | 7.9 ± 2.4                   | 9  |
| <i>SULTR2;1::FT</i>        | 4.2 ± 0.4                   | 1.2 ± 0.4                   | 14 |
| <i>SULTR2;1::FT; crp-3</i> | 5.4 ± 0.7 *                 | 1.6 ± 0.5                   | 13 |
| <i>SULTR2;1::FT; crp-4</i> | 7.2 ± 1.0 *                 | 1.9 ± 0.6                   | 20 |

Statistics for results presented in Fig. 2E.

The number of leaves is presented as the average ± SD.

Plants were grown on soil under long-day conditions.

\* Statistically significant difference (Student's *t*-test,  $P < 0.005$ ) from *SULTR2;1::FT*.

**Supplementary Table S4.** Genetic interaction between *crp* loss-of function mutants and flowering mutants.

| Genotype             | Number of rosette leaves | Number of cauline leaves | n  |
|----------------------|--------------------------|--------------------------|----|
| Col                  | 12.5 ± 0.9               | 2.9 ± 0.5                | 15 |
| <i>crp-3</i>         | 29.1 ± 1.7               | 8.5 ± 0.8                | 11 |
| <i>crp-4</i>         | 31.5 ± 2.0               | 9.7 ± 2.3                | 14 |
| <i>ft-2</i>          | 30.9 ± 2.5               | 6.7 ± 1.3                | 12 |
| <i>ft-2; crp-3</i>   | 39.6 ± 4.0 *             | 15.9 ± 3.3               | 19 |
| <i>ft-2; crp-4</i>   | 41.2 ± 3.6 *             | 17.3 ± 3.6               | 11 |
| Col                  | 9.6 ± 0.7                | 2.7 ± 0.5                | 12 |
| <i>crp-3</i>         | 31.0 ± 2.0               | 7.6 ± 1.4                | 14 |
| <i>crp-4</i>         | 30.9 ± 3.0               | 7.5 ± 2.2                | 12 |
| <i>tsf-1</i>         | 9.5 ± 0.5                | 2.8 ± 0.5                | 14 |
| <i>tsf-1; crp-3</i>  | 30.7 ± 3.0 **            | 8.4 ± 1.4                | 15 |
| <i>tsf-1; crp-4</i>  | 31.4 ± 2.6 **            | 8.4 ± 1.3                | 18 |
| Col                  | 10.4 ± 0.5               | 2.4 ± 0.5                | 12 |
| <i>crp-3</i>         | 29.5 ± 2.4               | 7.1 ± 1.6                | 15 |
| <i>crp-4</i>         | 32.5 ± 3.0               | 9.7 ± 1.7                | 20 |
| <i>fd-1</i>          | 16.9 ± 0.8               | 4.6 ± 0.8                | 12 |
| <i>fd-1; crp-3</i>   | 34.5 ± 2.3 *             | 12.1 ± 3.7               | 11 |
| <i>fd-1; crp-4</i>   | 35.6 ± 2.7 *             | 12.0 ± 2.7               | 17 |
| Col                  | 9.5 ± 0.7                | 2.7 ± 0.5                | 15 |
| <i>crp-3</i>         | 29.1 ± 2.9               | 7.6 ± 0.9                | 8  |
| <i>crp-4</i>         | 29.5 ± 2.0               | 6.7 ± 1.1                | 11 |
| <i>soc1-2</i>        | 18.4 ± 1.4               | 3.6 ± 0.7                | 12 |
| <i>soc1-2; crp-3</i> | 39.8 ± 2.5 *             | 14.6 ± 4.2               | 16 |
| <i>soc1-2; crp-4</i> | 38.6 ± 3.9 *             | 13.3 ± 3.9               | 16 |

(Supplementary Table S4 continued)

| Genotype            | Number of rosette leaves | Number of cauline leaves | n  |
|---------------------|--------------------------|--------------------------|----|
| Col                 | 9.9 ± 0.7                | 2.7 ± 0.5                | 12 |
| <i>crp-3</i>        | 34.3 ± 2.2               | 6.3 ± 1.0                | 12 |
| <i>crp-4</i>        | 35.9 ± 3.1               | 6.7 ± 1.6                | 10 |
| <i>flc-3</i>        | 7.7 ± 0.5                | 2.3 ± 0.5                | 12 |
| <i>flc-3; crp-3</i> | 24.2 ± 1.8 *             | 4.9 ± 1.3                | 16 |
| <i>flc-3; crp-4</i> | 25.1 ± 3.0 *             | 6.2 ± 1.2                | 18 |

Statistics for results presented in Fig. 2A.

The number of leaves is presented as the average ± SD.

Plants were grown on soil under long-day conditions.

\* Statistically significant difference (Student's *t*-test,  $P < 0.005$ ) from the corresponding *crp* single mutants in the same group.

\*\* No statistically significant difference (Student's *t*-test,  $P > 0.5$ ) from the corresponding *crp* single mutants in the same group.

**Supplementary Table S5.** Flowering time of *35S::CRP* under long-day and short-day conditions.

| Genotype            | Number of rosette leaves | Number of cauline leaves | n  |
|---------------------|--------------------------|--------------------------|----|
| Long day            |                          |                          |    |
| Col                 | 10.2 ± 0.7               | 2.5 ± 0.5                | 12 |
| <i>crp-1D</i>       | 7.6 ± 0.9                | 2.8 ± 0.4                | 12 |
| <i>35S::CRP</i> #11 | 12.0 ± 1.0 *             | 3.8 ± 0.8                | 12 |
| <i>35S::CRP</i> #12 | 11.1 ± 0.8               | 3.1 ± 0.5                | 12 |
| <i>35S::CRP</i> #14 | 10.8 ± 0.6               | 3.0 ± 0.6                | 12 |
| <i>35S::CRP</i> #15 | 9.8 ± 0                  | 2.8 ± 0.4                | 12 |
| Short day           |                          |                          |    |
| Col                 | 52.3 ± 3.4               | 8.4 ± 1.0                | 10 |
| <i>crp-1D</i>       | 48.8 ± 4.8               | 8.3 ± 1.5                | 12 |
| <i>35S::CRP</i> #11 | 54.8 ± 3.9               | 8.0 ± 0.5                | 10 |
| <i>35S::CRP</i> #12 | 54.5 ± 2.2               | 8.6 ± 1.1                | 10 |
| <i>35S::CRP</i> #14 | 52.9 ± 3.1               | 9.1 ± 1.0                | 11 |
| <i>35S::CRP</i> #15 | 52.1 ± 4.3               | 8.4 ± 0.5                | 10 |

Statistics for results presented in Fig. 3B and 3C.

The number of leaves is presented as the average ± SD.

Plants were grown on soil.

\* Statistically significant difference (Student's *t*-test,  $P < 0.005$ ) from Col.



**Supplementary Table S6.** Effect of *35S::CRP* on flowering time of *crp-1D* plants.

| Genotype                               | Number of rosette<br>leaves | Number of cauline<br>leaves | n  |
|----------------------------------------|-----------------------------|-----------------------------|----|
| Col                                    | 9.8 ± 0.8                   | 2.4 ± 0.5                   | 12 |
| <i>crp-1D</i>                          | 6.0 ± 0.9                   | 2.9 ± 0.3                   | 12 |
| <i>35S::CRP</i> #11                    | 11.0 ± 0.9                  | 3.1 ± 0.3                   | 12 |
| <i>crp-1D</i> × <i>35S::CRP</i> #11 F1 | 8.6 ± 0.7 *                 | 3.4 ± 0.6                   | 18 |

Statistics for results presented in Fig. 3D.

The number of leaves is presented as the average ± SD.

Plants were grown on soil under long-day conditions.

\* Statistically significant difference (Student's *t*-test,  $P < 0.005$ ) from *crp-1D*.

**Supplementary Table S7.** Effect of loss-of-function mutation of flowering genes on flowering time of *crp-1D* plants.

| Genotype              | Number of rosette leaves | Number of cauline leaves | n  |
|-----------------------|--------------------------|--------------------------|----|
| Col                   | 11.5 ± 0.8               | 3.2 ± 0.6                | 12 |
| <i>crp-1D</i>         | 7.6 ± 0.8                | 3.3 ± 0.5                | 12 |
| <i>ft-2</i>           | 26.1 ± 1.1               | 4.9 ± 0.8                | 15 |
| <i>ft-2; crp-1D</i>   | 25.9 ± 0.8 *             | 6.0 ± 1.2                | 14 |
| Col                   | 10.2 ± 0.7               | 2.3 ± 0.5                | 12 |
| <i>crp-1D</i>         | 7.2 ± 0.4                | 2.9 ± 0.5                | 12 |
| <i>tsf-1</i>          | 11.0 ± 1.2               | 2.6 ± 0.5                | 10 |
| <i>tsf-1; crp-1D</i>  | 7.4 ± 0.7                | 2.9 ± 0.3                | 12 |
| <i>fd-1</i>           | 18.1 ± 1.0               | 4.8 ± 0.8                | 11 |
| <i>fd-1; crp-1D</i>   | 8.7 ± 0.8 *              | 3.4 ± 0.7                | 12 |
| Col                   | 9.6 ± 0.7                | 2.5 ± 0.5                | 8  |
| <i>crp-1D</i>         | 6.1 ± 0.6                | 3.3 ± 0.5                | 8  |
| <i>soc1-2</i>         | 19.3 ± 0.9               | 3.3 ± 0.5                | 8  |
| <i>soc1-2; crp-1D</i> | 15.3 ± 1.8 *             | 4.1 ± 1.0                | 17 |
| Col                   | 9.8 ± 0.9                | 3.0 ± 0.4                | 12 |
| <i>crp-1D</i>         | 6.7 ± 0.5                | 3.1 ± 0.4                | 15 |
| <i>ful-2</i>          | 10.2 ± 0.9               | 3.9 ± 0.6                | 10 |
| <i>ful-2; crp-1D</i>  | 7.2 ± 0.8                | 4.2 ± 0.4                | 12 |
| Col                   | 9.4 ± 0.9                | 2.9 ± 0.5                | 12 |
| <i>crp-1D</i>         | 6.4 ± 0.8                | 3.0 ± 0.4                | 14 |
| <i>lfy-1</i>          | 14.2 ± 1.3               | 25.2 ± 6.5               | 14 |
| <i>lfy-1; crp-1D</i>  | 6.2 ± 0.7                | 4.8 ± 0.7                | 12 |

Statistics for results presented in Fig. 4C.

The number of leaves is presented as the average ± SD.

Plants were grown on soil under long-day conditions.

\* Statistically significant difference (Student's *t*-test,  $P < 0.005$ ) from *crp-1D* in the same group.

**Supplementary Table S8.** Effect of *fd-1* and *soc1-2* mutation on flowering time of *SULTR2;1::FT/-; crp-1D/+* plants.

| Genotype                                | Number of rosette<br>leaves | Number of<br>cauline leaves | n  |
|-----------------------------------------|-----------------------------|-----------------------------|----|
| Col                                     | 10.7 ± 0.8                  | 2.6 ± 0.5                   | 12 |
| <i>crp-1D</i>                           | 6.9 ± 0.7                   | 3.1 ± 0.7                   | 12 |
| <i>SULTR2;1::FT/-</i>                   | 4.7 ± 0.5                   | 1.4 ± 0.5                   | 12 |
| <i>SULTR2;1::FT/-; crp-1D/+</i>         | 2.0 ± 0.0                   | 2.0 ± 0.0                   | 15 |
| <i>SULTR2;1::FT/-; fd-1</i>             | 9.0 ± 0.4                   | 2.9 ± 0.3                   | 15 |
| <i>SULTR2;1::FT/-; fd-1; crp-1D/+</i>   | 3.0 ± 0.5 *                 | 2.4 ± 0.5                   | 8  |
| <i>SULTR2;1::FT/-; soc1-2</i>           | 8.6 ± 0.8                   | 0.6 ± 0.5                   | 22 |
| <i>SULTR2;1::FT/-; soc1-2; crp-1D/+</i> | 5.2 ± 0.8 *                 | 1.5 ± 0.5                   | 13 |

Statistics for results presented in Fig. 4E.

The number of leaves is presented as the average ± SD.

Plants were grown on soil under long-day conditions.

\* Statistically significant difference (Student's *t*-test,  $P < 0.005$ ) from *SULTR2;1::FT/-; crp-1D/+*.

**Supplementary Table S9.** Flowering time of *crp-2; mab2-1* plants.

| Genotype             | Number of rosette<br>leaves | Number of cauline<br>leaves | n  |
|----------------------|-----------------------------|-----------------------------|----|
| Ler                  | 5.4 ± 0.5                   | 2.2 ± 0.4                   | 10 |
| <i>mab2-1</i>        | 12.4 ± 0.8 *                | 7.1 ± 1.2                   | 7  |
| <i>crp-2</i>         | 12.4 ± 1.3 *                | 7.7 ± 1.0                   | 9  |
| <i>crp-2; mab2-1</i> | 12.7 ± 1.5 *                | 9.3 ± 1.8                   | 6  |

Statistics for results presented in Fig. 5C.

The number of leaves is presented as the average ± SD.

Plants were grown on soil under long-day conditions.

\* No statistically significant difference (Student's *t*-test,  $P > 0.5$ ) from among the genotypes.

**Supplementary Table S10.** Effects of *mab2-1* on flowering time of *crp-1D L* plants.

| Genotype                                                    | Number of rosette<br>leaves | Number of cauline<br>leaves | n  |
|-------------------------------------------------------------|-----------------------------|-----------------------------|----|
| Experiment 1                                                |                             |                             |    |
| Ler                                                         | 5.9 ± 0.5                   | 2.0 ± 0.4                   | 15 |
| <i>mab2-1</i>                                               | 12, 13                      | 6, 10                       | 2  |
| <i>crp-1D L</i>                                             | 4.1 ± 0.4                   | 2.4 ± 0.5                   | 14 |
| <i>crp-1D L; mab2-1</i>                                     | 11.9 ± 1.3                  | 7.4 ± 2.1                   | 9  |
| Experiment 2                                                |                             |                             |    |
| Ler                                                         | 6.3 ± 0.8                   | 3.4 ± 0.5                   | 7  |
| <i>crp-1D L</i>                                             | 4.3 ± 0.8                   | 3.0 ± 0.8                   | 7  |
| <i>35S::FT #1-5L</i>                                        | 2.4 ± 0.5                   | 2.4 ± 0.6                   | 16 |
| <i>35S::FT #1-5L; mab2-1/ mab2-1</i>                        | 4.8 ± 0.7 **                | 3.9 ± 1.2                   | 10 |
| <i>35S::FT #1-5L/-; crp-1DL/+</i>                           | 1.1 ± 0.5 *                 | 2.8 ± 1.1                   | 18 |
| <i>35S::FT #1-5L/-; crp-1DL/+;</i><br><i>mab2-1/ mab2-1</i> | 4.6 ± 0.5 *,**              | 3.6 ± 1.1                   | 5  |

Statistics for results presented in Fig. 5D and 5E.

The number of leaves is presented as the average ± SD.

Plants were grown on soil (Experiment 1) or on 1/2MS medium (Experiment 2) under long-day conditions.

\* Statistically significant difference (Student's *t*-test,  $P < 0.005$ ) between marked genotypes.

\*\* No statistically significant difference (Student's *t*-test,  $P > 0.5$ ) between marked genotypes.

**Supplementary Table S11.** Plant materials used in this study.

| Name                                                 | Background | References                | Note                                               |
|------------------------------------------------------|------------|---------------------------|----------------------------------------------------|
| <b>Wild-type</b>                                     |            |                           |                                                    |
| Col-0                                                | Col        |                           | CS6673 (stock name)                                |
| Ler-2                                                | Ler        |                           | CS8581 (stock name)                                |
| <b>EMS mutation</b>                                  |            |                           |                                                    |
| <i>crp-1D</i>                                        | Col        | this study                | S99F missense                                      |
| <i>crp-1D L</i>                                      | Ler        | this study                | introgression line                                 |
| <i>fd-1</i>                                          | Col        | Abe et al. 2005           | introgression line                                 |
| <i>ft-2</i>                                          | Col        | this study                | introgression line                                 |
| <i>ful-2</i>                                         | Col        | Ferrández et al. 2000     | W91stop nonsense                                   |
| <i>lfy-1</i>                                         | Col        | Schultz and Haughn 1991   | CS6228 (stock name)                                |
| <i>mab2-1</i>                                        | Ler        | Ito et al. 2011           | W1833stop nonsense                                 |
| <i>pid-2</i>                                         | Ler        | Bennett et al. 1995       | CS8063 (stock name)                                |
| <i>pid-3</i>                                         | Col        | Bennett et al. 1995       | CS8064 (stock name)                                |
| <b>Fast neutron deletion</b>                         |            |                           |                                                    |
| <i>flc-3</i>                                         | Col        | Michaels and Amasino 1999 | 104-bp deletion that removes the start codon       |
| <b>T-DNA/transposon insertion (loss-of-function)</b> |            |                           |                                                    |
| <i>crp-2</i>                                         | Ler        | this study                | Ds-transposon insertion (SET_3.701) <sup>1</sup>   |
| <i>crp-3</i>                                         | Col        | this study                | SALK_108241 described as <i>cct-2</i> <sup>2</sup> |
| <i>crp-4</i>                                         | Col        | this study                | SALK_124276 described as <i>cct-3</i> <sup>2</sup> |
| <i>soc1-2</i>                                        | Col        | Lee et al. 2000           | T-DNA insertion                                    |
| <i>tsf-1</i>                                         | Col        | Yamaguchi et al. 2005     | SALK_087522                                        |
| <b>Transgenic (gain-of-function)</b>                 |            |                           |                                                    |
| <i>35S::FT #1-5C</i>                                 | Col        | Kobayashi et al. 1999     | weak line                                          |
| <i>35S::FT #1-5L</i>                                 | Ler        | Kobayashi et al. 1999     | introgression line                                 |
| <i>35S::FT #11-1</i>                                 | Col        | Kobayashi et al. 1999     | strong line                                        |
| <i>35S::TSF #4-1</i>                                 | Col        | Kobayashi et al. 1999     | weak line                                          |
| <i>SULTR2;1::FT #1-a</i>                             | Col        | Abe et al. 2005           |                                                    |
| <i>soc1-101D</i>                                     | Col        | Lee et al. 2000           | activation-tagging line                            |
| <i>35S::LFY</i>                                      | Col        | Weigel and Nilsson 1995   | DW151.2.5C                                         |
| <i>35S::API</i>                                      | Col        | Mandel and Yanofsky 1995  |                                                    |

1: Parinov et al. 1999      2: Gilmor et al. 2010

**Supplementary Table S12.** Primer sets used in quantitative RT-PCR.

| Gene          | Sequence (5' to 3')         |                             | References            |
|---------------|-----------------------------|-----------------------------|-----------------------|
|               | Forward                     | Reverse                     |                       |
| <i>ACT2</i>   | GCTGAGAGATTCAGATGCCCA       | GTGGATTCCAGCAGCTTCCAT       | Kim et al. 2008       |
| <i>API</i>    | GAAGGCCATACAGGAGCAAA        | ACTGCTCCTGTTGAGCCCTA        | Yamaguchi et al. 2009 |
| <i>CO</i>     | CTACAACGACAATGGTTCCATTAAC   | CAGGGTCAGGTTGTTGCTC         | Nakamichi et al. 2007 |
| <i>CRP</i>    | ATACAAGGAAACTGTTGATGGACTT   | GCAATCGTTTGTGCTGTTGTG       | in this study         |
| <i>FD</i>     | TGTTTCTCTTTGGGGATTGA        | CCTTTTCTCTTTCCGGGTCT        | Yamaguchi et al. 2009 |
| <i>FLC</i>    | CCGAACTCATGTTGAAGCTTGTGAG   | CGGAGATTGTCCAGCAGGTG        | Jiang et al. 2007     |
| <i>FT</i>     | CTAGCAACCCTCACCTCCGAGAATA   | CTGCCAAGCTGTCGAAACAATATAA   | Wang et al. 2009      |
| <i>FUL</i>    | TTGCAAGATCACAACAATTCGTTCT   | GAGAGTTGGTTCCGTCACGACGAT    | Yamaguchi et al. 2009 |
| <i>LFY</i>    | ACGCCGTCATTTGCTACTCT        | CTTTCTCCGCTCTGCTGCT         | Yamaguchi et al. 2009 |
| <i>NRT1.7</i> | CAACAGTCAGTTCCAGAGCACAT     | CGACAGTCACAAGGAACTACTAAGGTA | Fan et al. 2009       |
| <i>SOCI</i>   | ATAGGAACATGCTCAATCGAGGAGCTG | TTTCTGAAGAACAAGGTAACCCAATG  | Wang et al. 2009      |
| <i>STM</i>    | CTCTTGCGCAAGTACAGTGG        | GGTGAGGATGTGTTGCGTC         | Takami et al. 2010    |
| <i>TSF</i>    | GAGTCCAAGCAACCCTCACCAA      | CACAATACGATGAATTCCCGAG      | Yamaguchi et al. 2005 |

**Supplementary Table S13.** Primer sets used in semi-quantitative RT-PCR.

| Gene        | Sequence (5' to 3')           |                               | References      |
|-------------|-------------------------------|-------------------------------|-----------------|
|             | Forward                       | Reverse                       |                 |
| <i>ACT2</i> | AGAGATTCAGATGCCCAGAAGTCTTGTCC | AACGATTCTGGACCTGCCTCATCATACTC | Abe et al. 2005 |
| <i>CRP</i>  | CATGAAGGAGTTAGTGAAGC          | AGTCCTTTGCTTTCACCTAC          | in this study   |

**Supplementary Table S14.** Primer sets used in constructs.

| Primer     | Sequence (5' to 3')              | Experiment                  |
|------------|----------------------------------|-----------------------------|
| CRP pro. 1 | ATAATAAAATGAATGAAAGTAATAATAAT    | <i>CRP::GUS</i>             |
| CRP pro. 2 | TTCTCCCAACTATATCCAGCATACT        | <i>CRP::GUS</i>             |
| CRP ATG    | gtcgacATGCAAAGGTATCATGCTGCCAACTG | <i>CRP-GFP, crp-1D-GFP</i>  |
| CRP stop   | ttctcgagCCTCAGCTGTCGTCGCTACTG    | <i>CRP::GFP, crp-1D-GFP</i> |

**Supplementary Table S15.** Accession numbers of *Arabidopsis* genes used in this study.

|          | Gene                                 | AGI code  |
|----------|--------------------------------------|-----------|
| ACT2     | ACTIN2                               | At3g18780 |
| AG       | AGAMOUS                              | At4g18960 |
| AP1      | APETALA 1                            | At1g69120 |
| CLF      | CURLY LEAF                           | At2g23380 |
| CO       | CONSTANS                             | At5g15840 |
| CRP      | CRYPTIC PRECOCIOUS                   | At4g00450 |
| CYC1;1   | Cyclin C 1;1                         | At5g48640 |
| CYC1;2   | Cyclin C 1;2                         | At5g48630 |
| ETT      | ETTIN                                | At2g33860 |
| FD       | FD                                   | At4g35900 |
| FLC      | FLOWERING LOCUS C                    | At5g10140 |
| FT       | FLOWERING LOCUS T                    | At1g65480 |
| FUL      | FRUITFULL                            | At5g60910 |
| HEN3     | HUA ENHANCER 3                       | At5g63610 |
| LFY      | LEAFY                                | At5g61850 |
| LUG      | LEUNIG                               | At4g32551 |
| NRT1.7   | NITRATE TRANSPORTER 1.7              | At1g69870 |
| MAB2     | MACCHI-BOU 2                         | At1g55325 |
| MED8     | MEDIATOR COMPLEX SUBUNIT 8           | At5g63480 |
| PFT1     | PHYTOCHROME AND FLOWERING TIME 1     | At1g25540 |
| PID      | PINOID                               | At2g34650 |
| SEU      | SEUSS                                | At1g43850 |
| SOC1     | SUPPRESSOR OF OVEREXPRESSION OF CO 1 | At2g45660 |
| STM      | SHOOT MERISTEMLESS                   | At1g62360 |
| SULTR2;1 | SULFATE TRANSPORTER 2;1              | At5g10180 |
| TSF      | TWIN SISTER OF FT                    | At4g20370 |

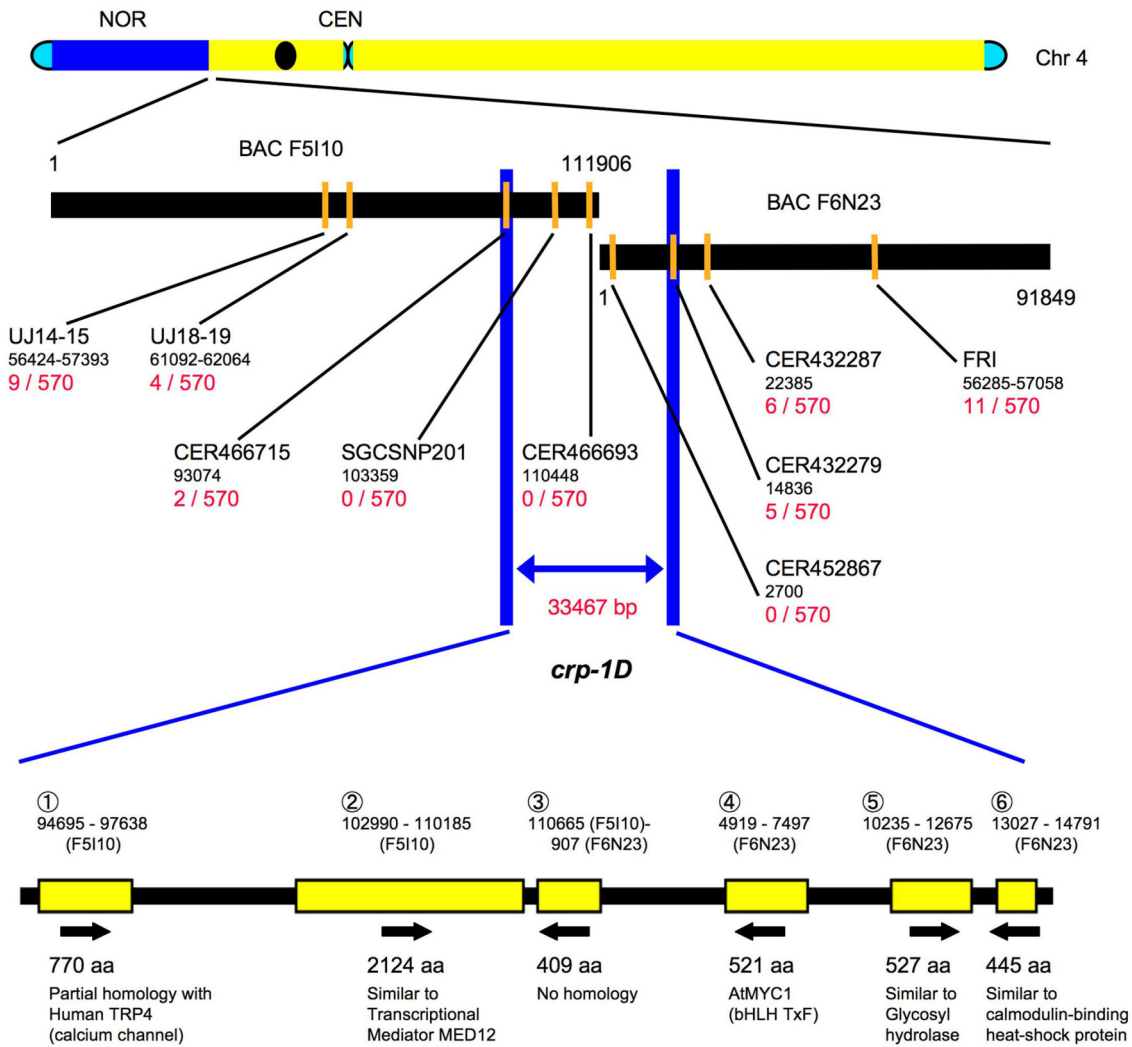

### Supplementary Figure S1. Mapping and identification of the *CRP* gene.

The *CRP* locus was mapped to a 33,467-bp region between CER466715 (BAC F5110) and CER432279 (BAC F6N23) markers on the top arm of chromosome 4 by analyzing *CRP*<sup>+</sup>/*CRP*<sup>+</sup> progeny from a cross between *crp-1D* (Col) and *35S::FT* (Ler). Six genes were predicted in the region. No significant change in expression level of these genes was observed in *crp-1D* relative to wild type. A C-to-T substitution in the coding region of gene 2 (At4g00450) was the found by sequence analysis of these six genes in *crp-1D* mutant.



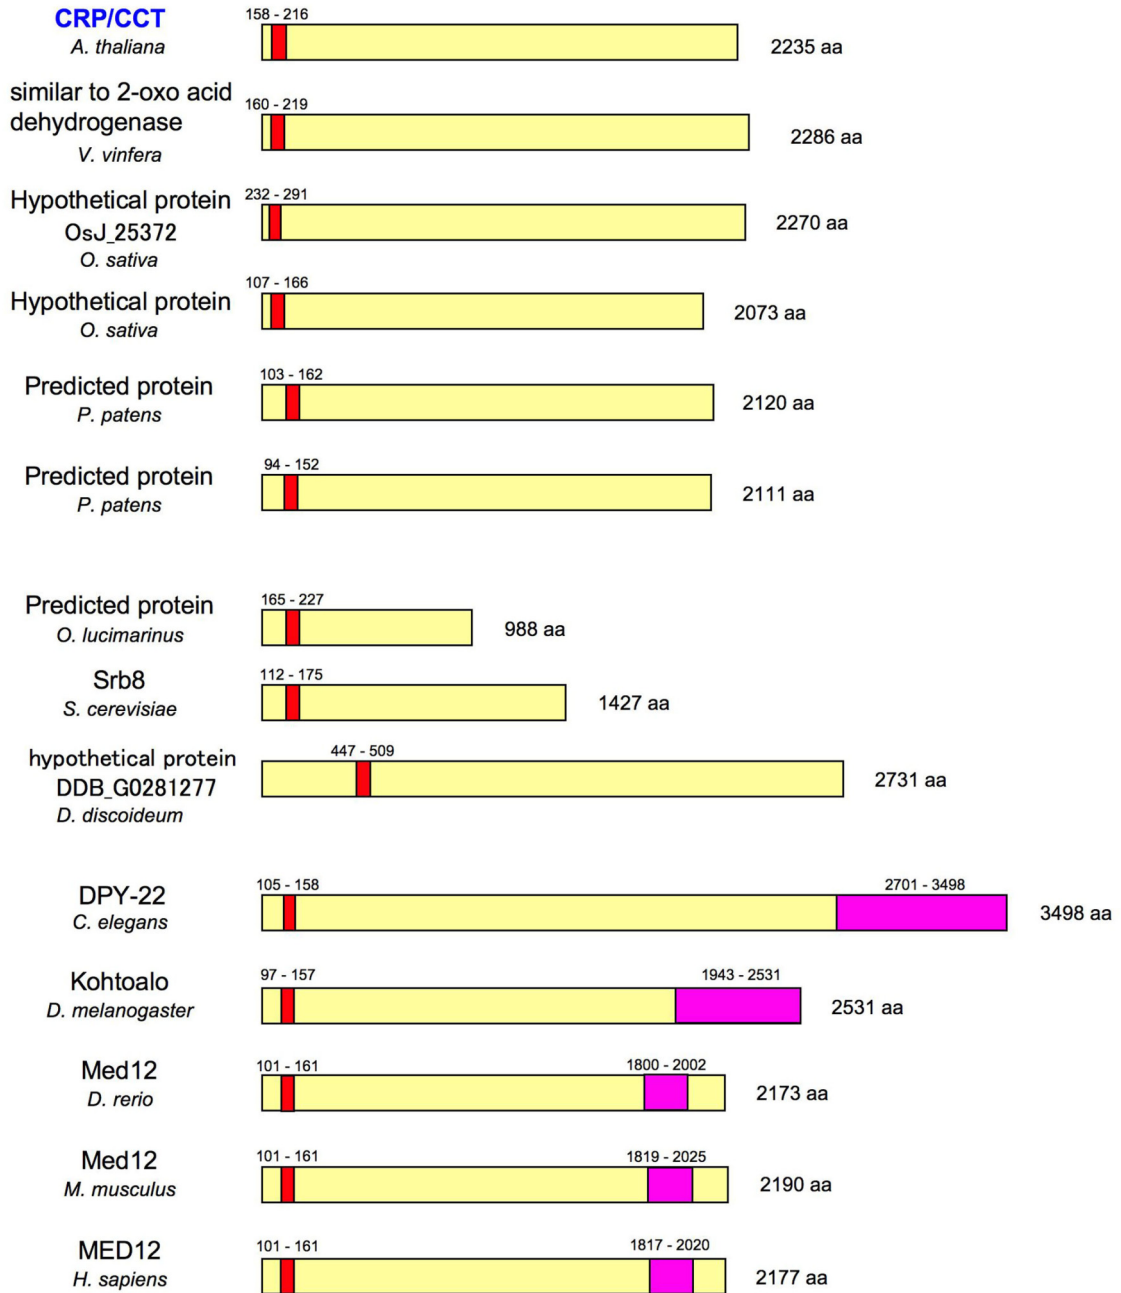

**Supplementary Figure S2. The domain structure of MED12 orthologues.**

Red and pink boxes represent MED12 domain and PQL region, respectively.

SSM#1

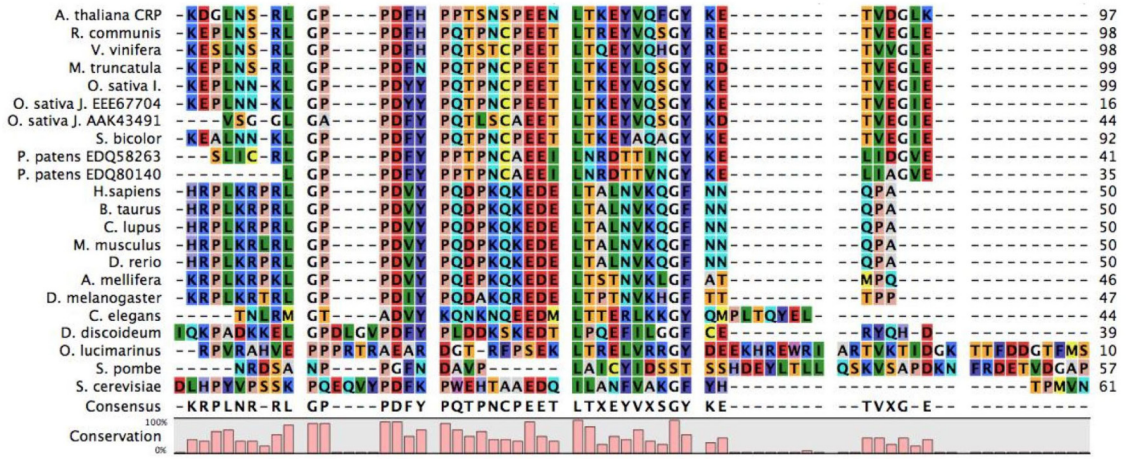

SSM#2

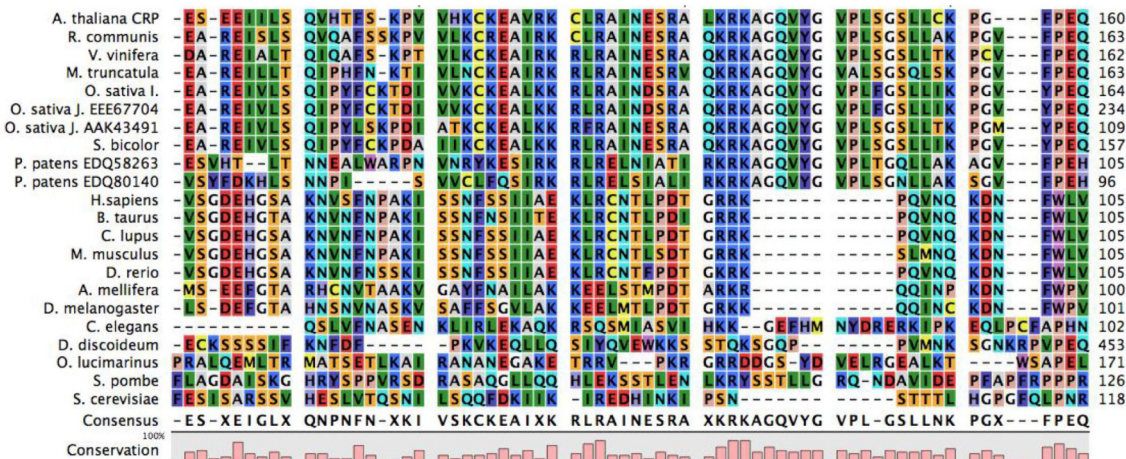

SSM#3

SSM#4

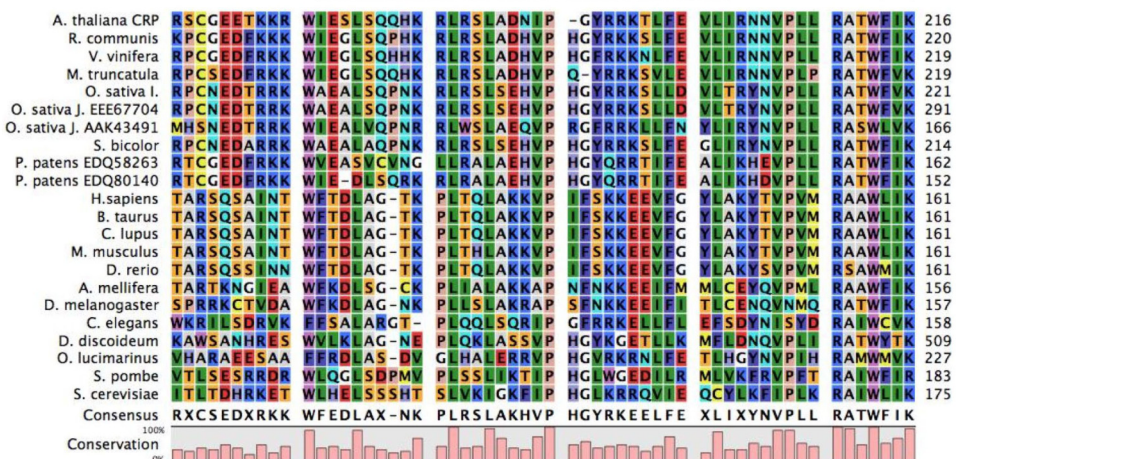

### Supplementary Figure S3. Sequence alignment of MED12 proteins.

Sequence alignment of MED12 domain of CRP and MED12 orthologues. Alignment was done with the CLC sequence viewer 6 for the twenty-two sequences summarized in Table below. Thick lines indicate signature sequence motif (SSM) (Bourbon 2008). Arrowheads indicate the position of *crp-ID* mutation. Arrows indicate from start and end positions of the MED12 domain.

#### MED12 orthologues.

| Name                      |              | Length | MED12 domain |
|---------------------------|--------------|--------|--------------|
| Arabidopsis thaliana      | CRP          | 2235   | 158 - 216    |
| Ricinus communis          | XP_002511863 | 2264   | 161 - 220    |
| Vitis vinifera            | XM_002274443 | 2286   | 160 - 219    |
| Medicago truncatula       | ABD32834     | 2270   | 161 - 219    |
| Oryza sativa Indica       | EEC82567     | 2094   | 162 - 221    |
| Oryza sativa. japonica    | EEE67704     | 2270   | 232 - 291    |
| Oryza sativa. japonica    | AAK43491     | 2073   | 107 - 166    |
| Sorghum bicolor           | XP_002466024 | 2201   | 155 - 214    |
| Physcomitrella patens     | EDQ58263     | 2120   | 103 - 162    |
| Physcomitrella patens     | EDQ80140     | 2111   | 94 - 152     |
| Homo sapiens              | NM_005120.2  | 2177   | 101 - 161    |
| Bos taurus                | XP_599229    | 2176   | 101 - 161    |
| Canis lupus               | XP_538072    | 2186   | 101 - 161    |
| Mus musculus              | NP_067496    | 2190   | 101 - 161    |
| Danio rerio               | NP_001034550 | 2173   | 101 - 161    |
| Apis mellifera            | XP_392792    | 2243   | 97 - 157     |
| Drosophila melanogaster   | NP_524786    | 2531   | 97 - 157     |
| Caenorhabditis elegans    | NP_509645    | 3498   | 105 - 158    |
| Dictyostelium discoideum  | XP_640927    | 2731   | 447 - 509    |
| Ostreococcus lucimarinus  | XP_001420511 | 988    | 165 - 227    |
| Schizosaccharomyces pombe | NP_594066    | 1134   | 120 - 183    |
| Saccharomyces cerevisiae  | NP_010004    | 1427   | 112 - 175    |

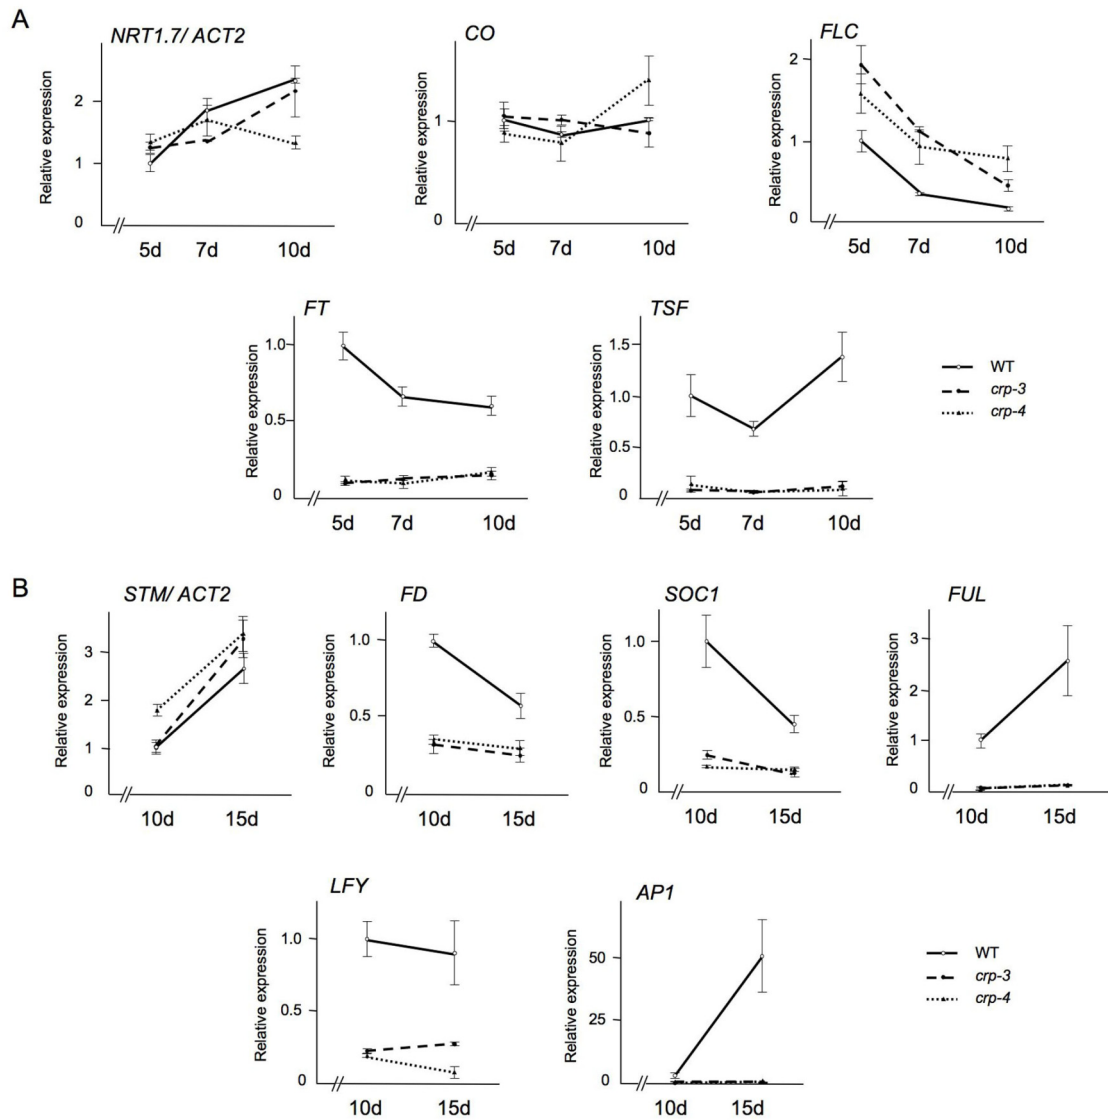

**Supplementary Figure S4. Expression level of *NRT1.7* and *STM* in *crp* mutant plants.**

(A) *NRT1.7* expression level (relative to *ACT2*) and expression levels of *CO*, *FLC*, *FT* and *TSF* (normalized by *NRT1.7*) in wild-type Col and *crp* mutants. Aerial parts of seedlings grown under long-day conditions were harvested on days 5, 7, and 10 for qRT-PCR analysis.

(B) *STM* expression (relative to *ACT2*) and expression levels of *FD*, *SOC1*, *FUL*, *LFY*, and *AP1* (normalized by *STM*) in wild-type Col and *crp* mutants. Shoot apical region of seedlings grown under long-day conditions was harvested on days 10 and 15 for qRT-PCR analysis.

Error bars indicate SE (n=9).

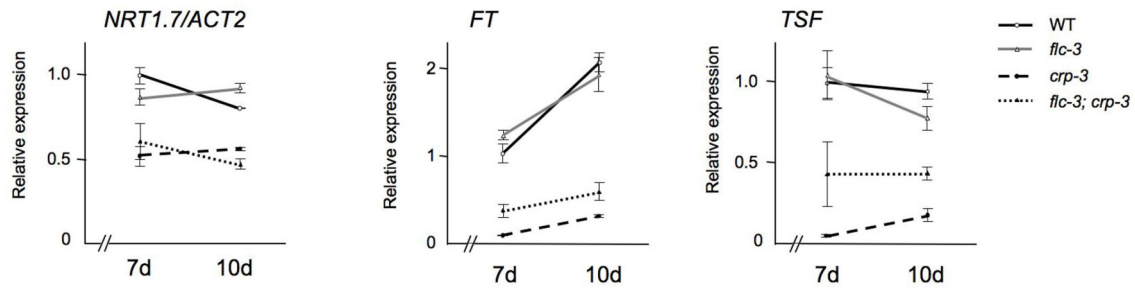

**Supplementary Figure S5. Effect of *flc* loss-of-function mutation on expression levels of *FT* and *TSF* in *crp-3*.**

*NRT1.7* expression level (relative to *ACT2*) and expression levels of *FT* and *TSF* (normalized by *NRT1.7*) in wild-type Col, *flc-3*, *crp-3* and *flc-3; crp-3* plants. Aerial parts of seedlings grown under long-day conditions were harvested on days 7 and 10 for qRT-PCR analysis.

Error bars indicate SE (n=9).

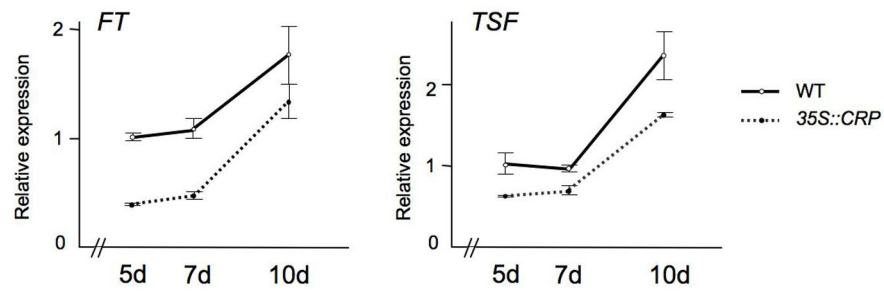

**Supplementary Figure S6. Effects of *CRP* over-expression on expression levels of *FT* and *TSF*.**

*FT* and *TSF* expression levels (normalized by *NRT1.7*) in wild-type Col and *35S::CRP* #11 plants. Aerial parts of seedlings grown under long-day conditions were harvested on days 5, 7 and 10 for qRT-PCR analysis.

Error bars indicate SE (n=9).

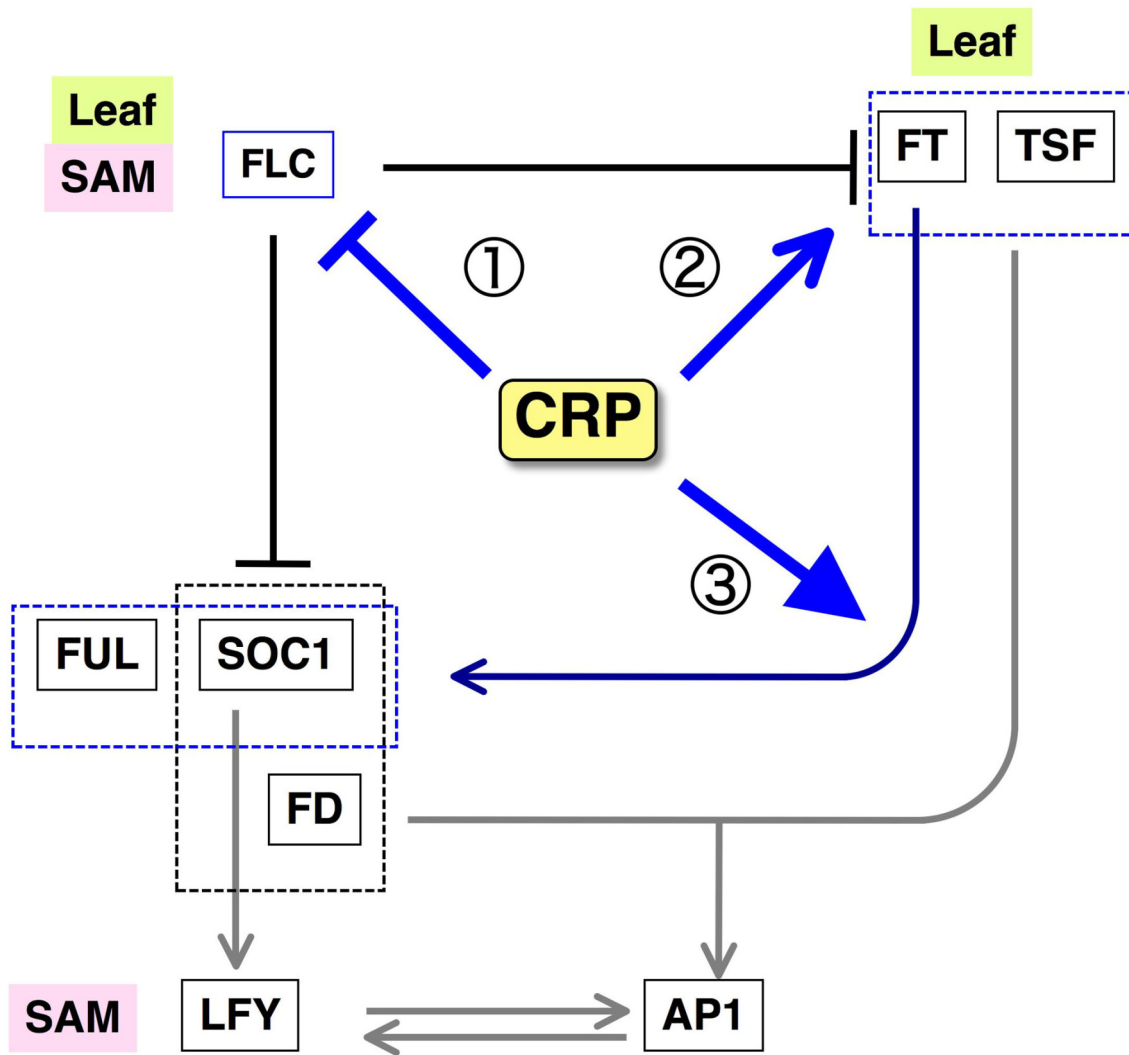

**Supplementary Figure S7. Genetic framework of feed-forward regulation by *CRP*.** Arrows indicate transcriptional activation. T-bars indicate transcriptional repression. See text for detailed explanation.

## References

- Abe, M., Kobayashi, Y., Yamamoto, S., Daimon, Y., Yamaguchi, A., Ikeda, Y. et al. (2005) FD, a bZIP protein mediating signals from the floral pathway integrator FT at the shoot apex. *Science* 309: 1052-1056.
- Bennett, S.R.M., Alvarez, J., Bossinger, G. and Smyth, D.R. (1995) Morphogenesis in *pinoid* mutants of *Arabidopsis thaliana*. *Plant J.* 8: 505-520.
- Fan, S.C., Lin, C.S., Hsu, P.K., Lin, S.H. and Tsay, Y.F. (2009) The Arabidopsis nitrate transporter NRT1.7, expressed in phloem, is responsible for source-to-sink remobilization of nitrate. *Plant Cell* 21: 2750-2761.
- Ferrándiz, C., Gu, Q., Martienssen, R. and Yanofsky, M.F. (2000) Redundant regulation of meristem identity and plant architecture by FRUITFULL, APETALA1 and CAULIFLOWER. *Development* 127: 725-734.
- Gillmor, C.S., Park, M.Y., Smith, M.R., Pepitone, R., Kerstetter, R.A. and Poethig, R.S. (2010) The MED12-MED13 module of Mediator regulates the timing of embryo patterning in *Arabidopsis*. *Development* 137: 113-122.
- Ito, J., Sono, T., Tasaka, M. and Furutani, M. (2011) *MACCHI-BOU 2* is required for early embryo patterning and cotyledon organogenesis in Arabidopsis. *Plant Cell Physiol.* 52: 539-552.
- Jiang, D., Yang, W., He, Y. and Amasino, R.M. (2007) Arabidopsis relatives of the human lysine-specific Demethylase1 repress the expression of FWA and FLOWERING LOCUS C and thus promote the floral transition. *Plant Cell* 19: 2975-2987.
- Kim, S.Y., Yu, X. and Michaels, S.D. (2008) Regulation of CONSTANS and FLOWERING LOCUS T expression in response to changing light quality. *Plant Physiol.* 148: 269-279.
- Kobayashi, Y., Kaya, H., Goto, K., Iwabuchi, M. and Araki, T. (1999) A pair of related genes with antagonistic roles in mediating flowering signals. *Science* 286: 1960-1962.
- Lee, H., Suh, S.S., Park, E., Cho, E., Ahn, J.H., Kim, S.G. et al. (2000) The AGAMOUS-LIKE 20 MADS domain protein integrates floral inductive pathways in *Arabidopsis*. *Genes Dev.* 14: 2366-2376.



Mandel, M.A. and Yanofsky, M.F. (1995) The Arabidopsis *AGL8* MADS box gene is expressed in inflorescence meristems and is negatively regulated by *APETALAI*. *Plant Cell* 7: 1763-1771.

Michaels, S.D. and Amasino, R.M. (1999) *FLOWERING LOCUS C* encodes a novel MADS domain protein that acts as a repressor of flowering. *Plant Cell* 11: 949-956.

Nakamichi, N., Kita, M., Niinuma, K., Ito, S., Yamashino, T., Mizoguchi, T. et al. (2007) Arabidopsis clock-associated pseudo-response regulators PRR9, PRR7 and PRR5 coordinately and positively regulate flowering time through the canonical CONSTANS-dependent photoperiodic pathway. *Plant Cell Physiol.* 48: 822-832.

Parinov, S., Sevugan, M., Ye, D., Yang, W.C., Kumaran, M. and Sundaresan, V. (1999) Analysis of flanking sequences from *dissociation* insertion lines: a database for reverse genetics in Arabidopsis. *Plant Cell* 11: 2263-2270.

Schultz, E.A. and Haughn, G.W. (1991) *LEAFY*, a Homeotic Gene That Regulates Inflorescence Development in Arabidopsis. *Plant Cell* 3: 771-781.

Takami, T., Shibata, M., Kobayashi, Y. and Shikanai, T. (2010) De novo biosynthesis of fatty acids plays critical roles in the response of the photosynthetic machinery to low temperature in Arabidopsis. *Plant Cell Physiol.* 51: 1265-1275.

Wang, J.W., Czech, B. and Weigel, D. (2009) miR156-regulated SPL transcription factors define an endogenous flowering pathway in Arabidopsis thaliana. *Cell* 138: 738-749.

Weigel, D. and Nilsson, O. (1995) A developmental switch sufficient for flower initiation in diverse plants. *Nature* 377: 495-500.

Yamaguchi, A., Kobayashi, Y., Goto, K., Abe, M. and Araki, T. (2005) TWIN SISTER OF FT (TSF) acts as a floral pathway integrator redundantly with FT. *Plant Cell Physiol.* 46: 1175-1189.

Yamaguchi, A., Wu, M.F., Yang, L., Wu, G., Poethig, R.S. and Wagner, D. (2009) The microRNA-regulated SBP-Box transcription factor SPL3 is a direct upstream activator of *LEAFY*, *FRUITFULL*, and *APETALAI*. *Dev. Cell* 17: 268-278.
